# Supplementary material for: Laboratory rivers: Lacey's law, threshold theory, and channel stability
Source: Copernicus journal article supplement (doi:10.5194/esurf-5-187-2017), 2017-03-22
Supplement: Supplementary file 1 [file esurf-5-187-2017-supplement.zip]

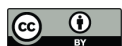

## *Supplement of*

# **Laboratory rivers: Lacey's law, threshold theory, and channel stability**

**François Métivier et al.**

*Correspondence to:* François Métivier (metivier@ipgp.fr)

- esurf-5-187-2017-supplement-title-page.pdf
- dataMetivier2017.txt

The copyright of individual parts of the supplement might differ from the CC-BY 3.0 licence.
